# Supplementary material for: Fumonisin B1 Epigenetically Regulates PTEN Expression and Modulates DNA Damage Checkpoint Regulation in HepG2 Liver Cells
Source: PubMed Central journal article supplement (PMC7601513; doi:10.3390/toxins12100625), 2020-09-30
Supplement: toxins-12-00625-s001.pdf [file toxins-12-00625-s001.pdf]

# Supplementary Materials: Fumonisin B1 Epigenetically Regulates PTEN Expression and Modulates DNA Damage Checkpoint Regulation in HepG2 Liver Cells

Thilona Arumugam, Terisha Ghazi and Anil Chaturgoon

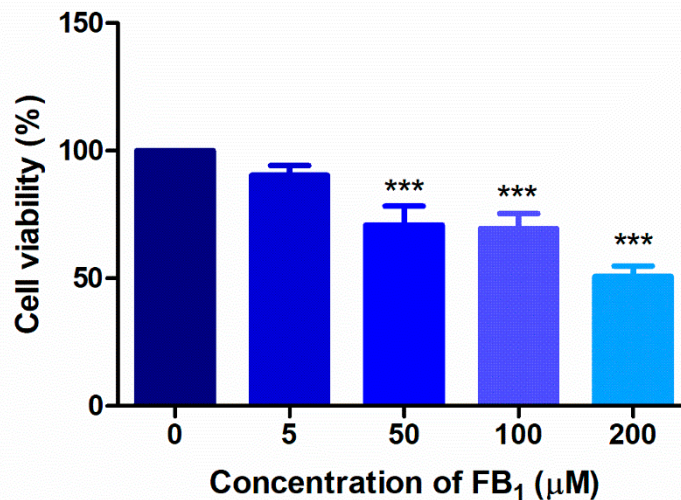

**Figure S1.** The cytotoxic effects of FB<sub>1</sub> on HepG2 cells. HepG2 cells were treated with 0, 5, 50, 100 and 200 µM FB<sub>1</sub> for 24h. Cell viability was determined using the crystal violet assay and expressed as a percentage of the untreated control. Control viability was taken as 100%. FB<sub>1</sub> significantly altered the cell viability of HepG2 cells. Data is represented as mean percentage cell viability ± SD (n = 3) (\*\*\*)  $p \leq 0.001$ ; one-way ANOVA with the Dunnett: compare all columns to control post-test).

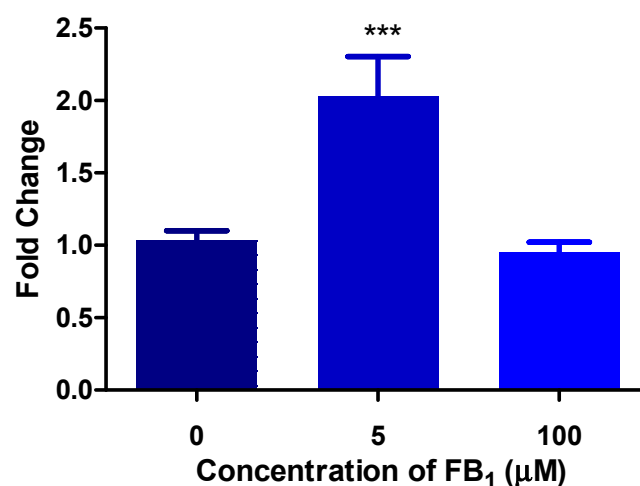

**Figure S2.** FB<sub>1</sub> induced 8-OHdG levels in HepG2 cells. 8-OHdG levels were measured as a marker of oxidative DNA damage. FB<sub>1</sub> significantly altered 8-OHdG levels in HepG2 cells (\*\*\*)  $p = 0.0007$ ). Data is represented as mean fold change ± SD (n = 3) (\*\*\*)  $p \leq 0.001$ ; one-way ANOVA with the Dunnett: compare all columns to control post-test).

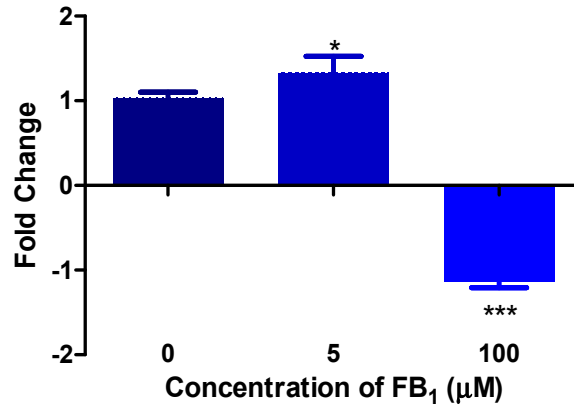

**Figure S3.** FB<sub>1</sub> altered miR-30c expression in HepG2 cells. qPCR analysis of miR-30c showed that FB<sub>1</sub> significantly altered miR-30c expression (\*\**p* < 0.0001). Results are represented as mean fold-change ± SD (n = 3) (\**p* < 0.05, \*\*\**p* < 0.0001; one-way ANOVA with the Dunnett: compare all columns to control post-test).

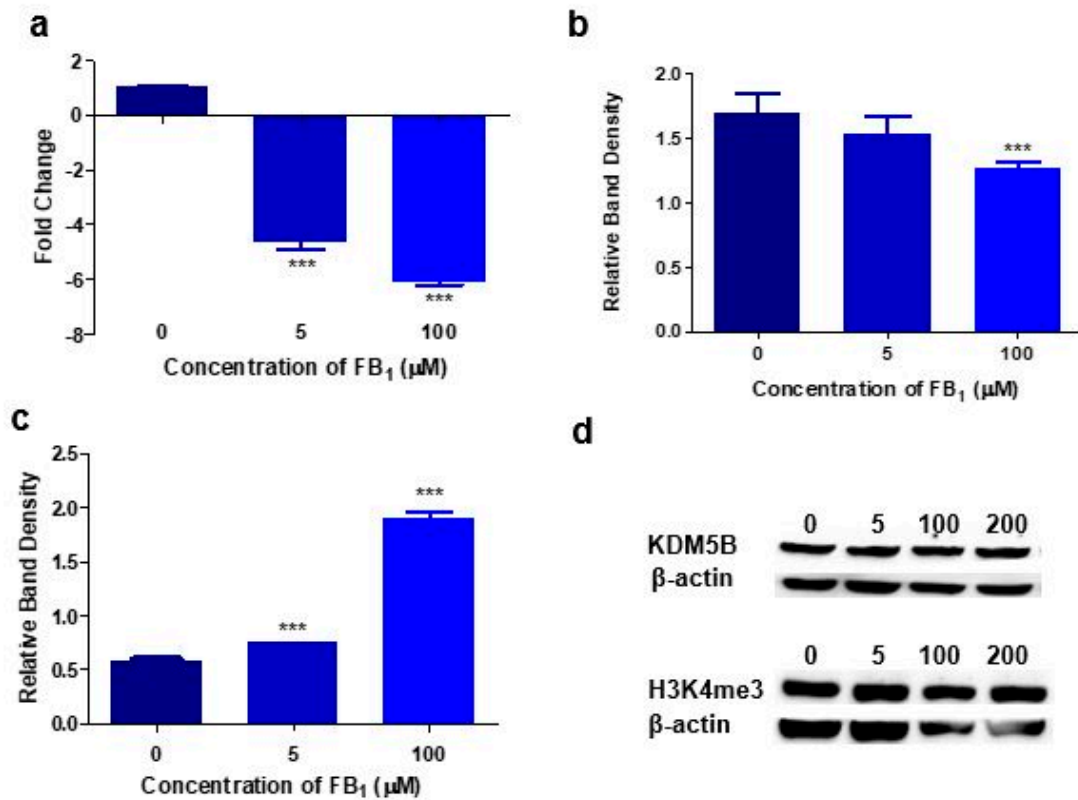

**Figure S4.** The effect of FB<sub>1</sub> on KDM5B and H3K4me3 expression in HepG2 cells. FB<sub>1</sub> reduced both the transcript (a; \*\*\**p* < 0.0001) and protein (b; \**p* = 0.0106) expression of KDM5B. There was a dose-dependent increase in total H3K4me3 (c; \*\*\**p* < 0.0001). Western blot images of KDM5B and H3K4me3 (d). KDM5B and H3K4me3 expression was normalized against β-actin. Results are represented as mean fold-change ± SD (n = 3) for gene expression and mean relative band density ± SD (n = 3) for protein expression (\*\**p* < 0.0001; one-way ANOVA with the Dunnett: compare all columns to control post-test).

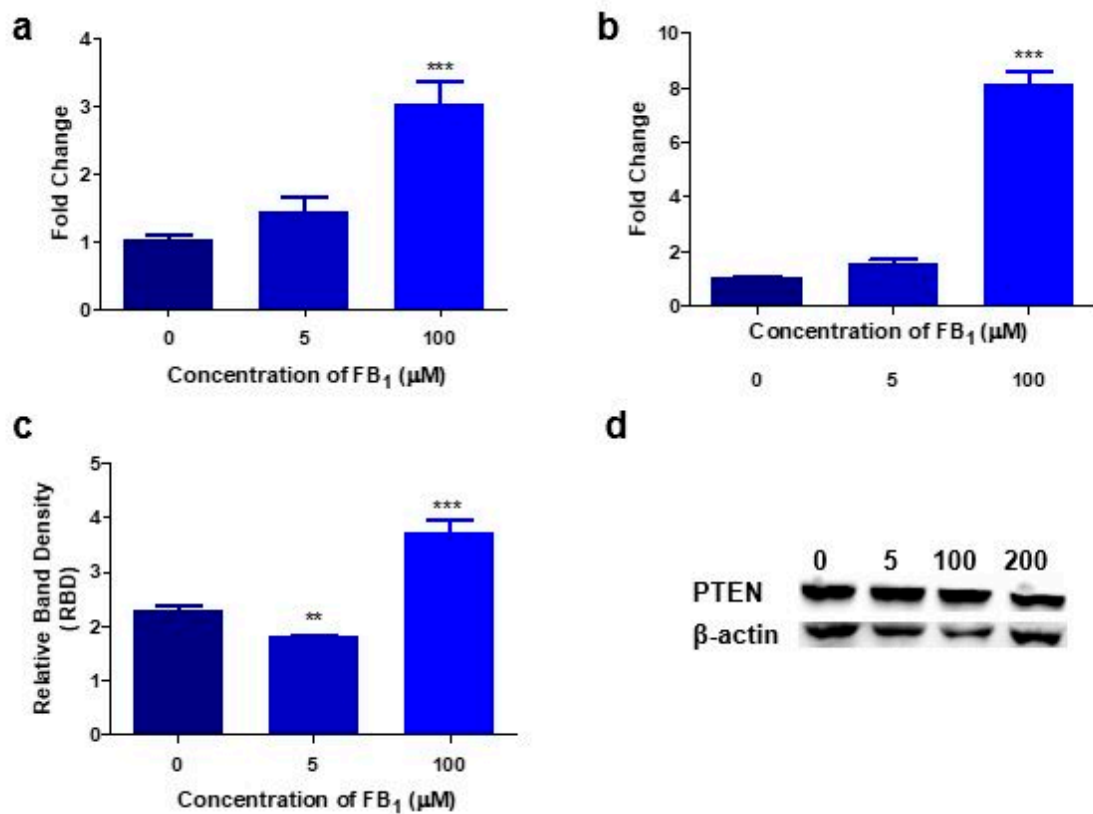

**Figure S5.** FB<sub>1</sub> induced KDM5B and miR-30c modulates PTEN expression. PTEN expression is under the influence of both KDM5B and miR-30c. **(a)** Low levels of KDM5B allowed for the increased H3K4me3 at *PTEN* promoter regions (\*\**p* < 0.0001). **(b)** This resulted in significantly higher levels of *PTEN* transcripts (\*\**p* < 0.0001). **(c)** However, miR-30c inhibited *PTEN* translation/protein expression at 5 μM FB<sub>1</sub> but increased *PTEN* translation at 100 μM FB<sub>1</sub> (\*\**p* < 0.0001). **(d)** Western blot images of *PTEN*. *PTEN* expression was normalized against β-actin. Results are represented as mean fold-change ± SD (n = 3) for gene expression and mean relative band density ± SD (n = 3) for protein expression (\**p* < 0.05, \*\*\**p* < 0.0001; one-way ANOVA with the Dunnett: compare all columns to control post-test).

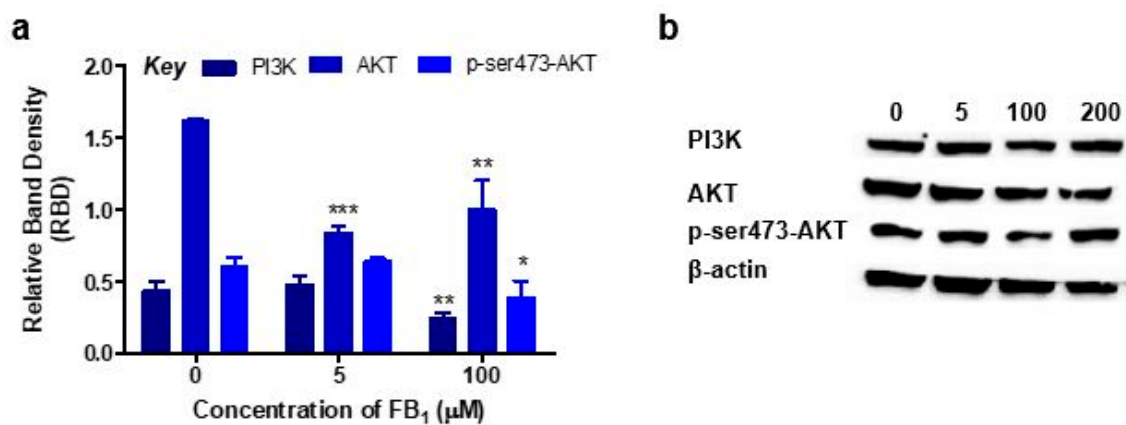

**Figure S6.** The effect of FB<sub>1</sub> on the PI3K/AKT signalling cascade. **(a)** Western blotting was used to determine the effect of FB<sub>1</sub> on the *PTEN*/PI3K/AKT signalling network. FB<sub>1</sub> significantly altered PI3K (\*\**p* < 0.0001), AKT (\*\**p* = 0.0004) and p-ser473-AKT (\**p* < 0.0174) protein expression. **(b)** Western blot images of PI3K, AKT and pAKT. p-ser473-AKT expression was normalized against AKT and

PI3K and AKT expression was normalized against  $\beta$ -actin. Data is represented as mean RBD  $\pm$  SD (n = 3), (\*  $p \leq 0.05$ , \*\* $p \leq 0.01$  and \*\*\* $p \leq 0.001$ ; one-way ANOVA with the Dunnet: compare all columns to control post-test).

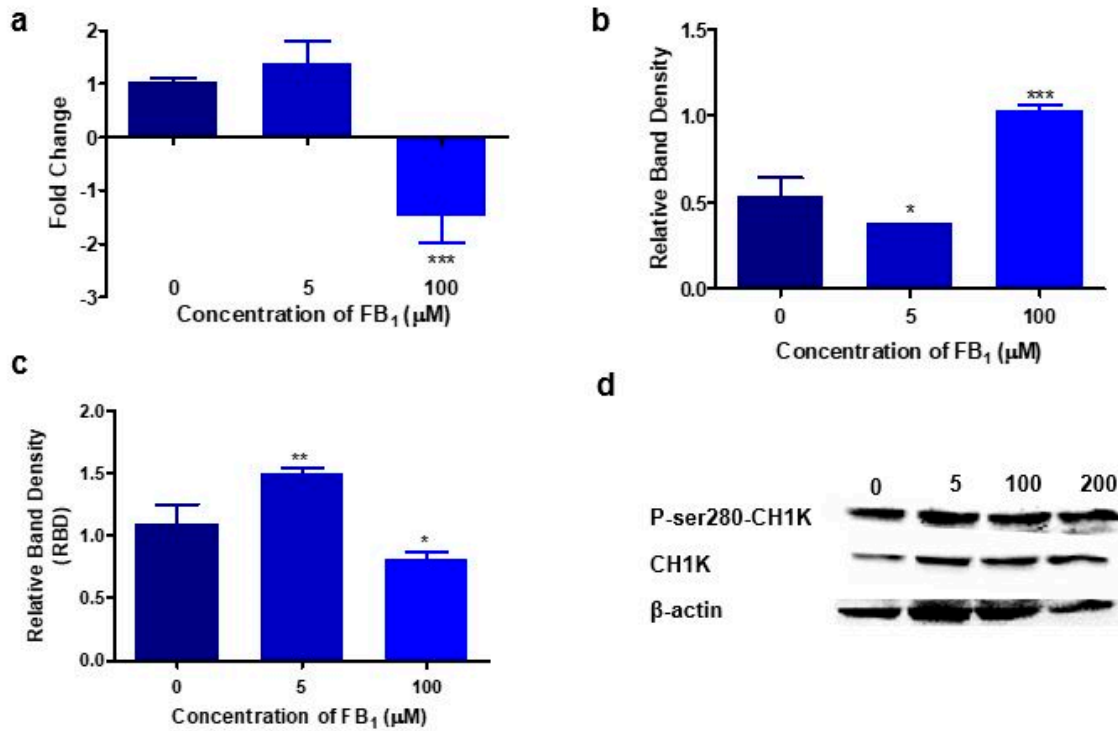

**Figure S7.** The influence of FB<sub>1</sub> on CHK1 expression in HepG2 cells. FB<sub>1</sub> significantly altered *CHK1* gene expression (a; \*\*\* $p = 0.0001$ ), CHK1 protein expression (b; \*\*\*  $p < 0.0001$ ) and p-ser280-CHK1 (c; \*\*\* $p = 0.0006$ ). (d) Western blot images of CHK1 and p-ser280-CHK1. CHK1 expression was normalized against  $\beta$ -actin and p-ser280-CHK1 was normalized against CHK1. Gene expression is represented as fold changes  $\pm$  SD relative to the control and protein expression is represented as mean RBD  $\pm$  SD (\* $p \leq 0.05$ , \*\* $p \leq 0.01$  and \*\*\* $p \leq 0.001$ ; one-way ANOVA with the Dunnet: compare all columns to control post-test).
